# Supplementary material for: Two-Step Targeted Drug Delivery via Proteinaceous Barnase-Barstar Interface and Doxorubicin-Loaded Nano-PLGA Outperforms One-Step Strategy for Targeted Delivery to HER2-Overexpressing Cells
Source: MDPI journal article supplement (doi:10.3390/pharmaceutics15010052), 2022-12-24
Supplement: s1 [file s1]

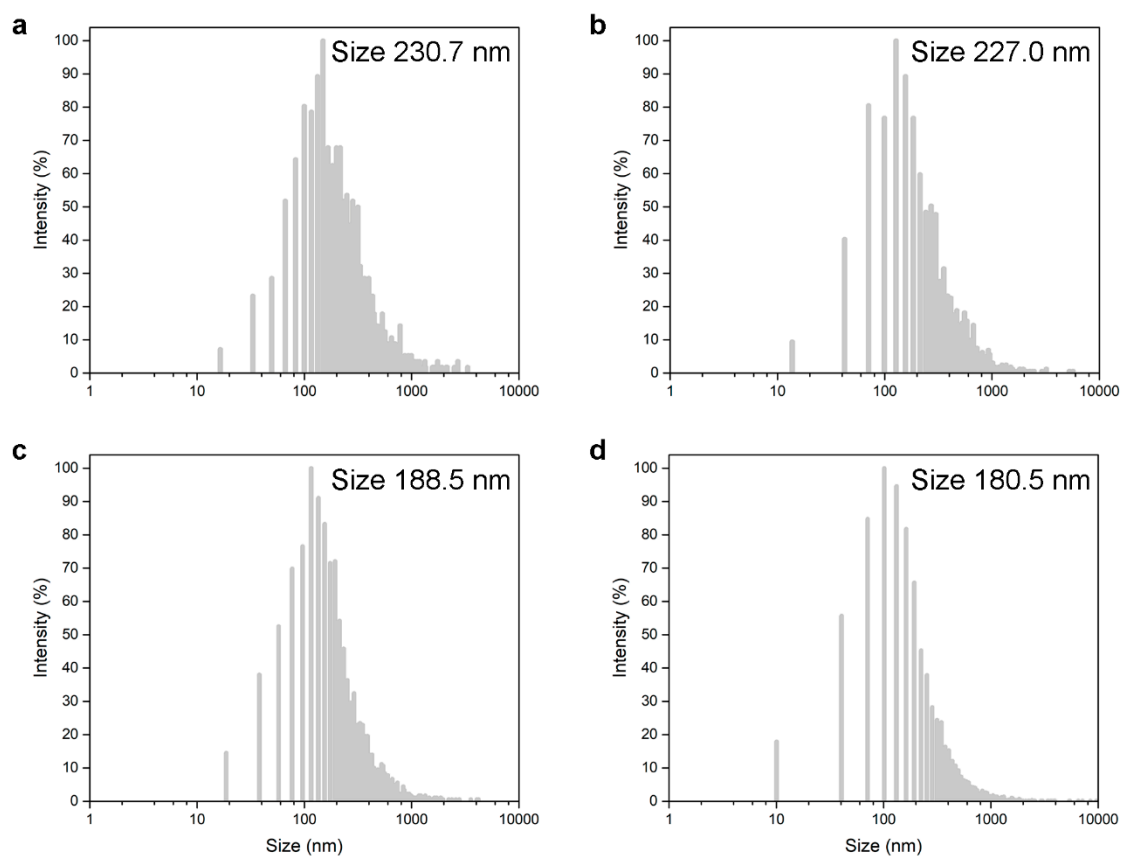

**Figure S1.** Physico-chemical properties of PLGA nanoparticles. Particle size distribution obtained with an AstraTrace (Abisense, Russia) for nanoparticles synthesized with 5 g/L (a), 1.7 g/L (b), 0.5 g/L (c), and 0.17 g/L (d) Nile Blue.

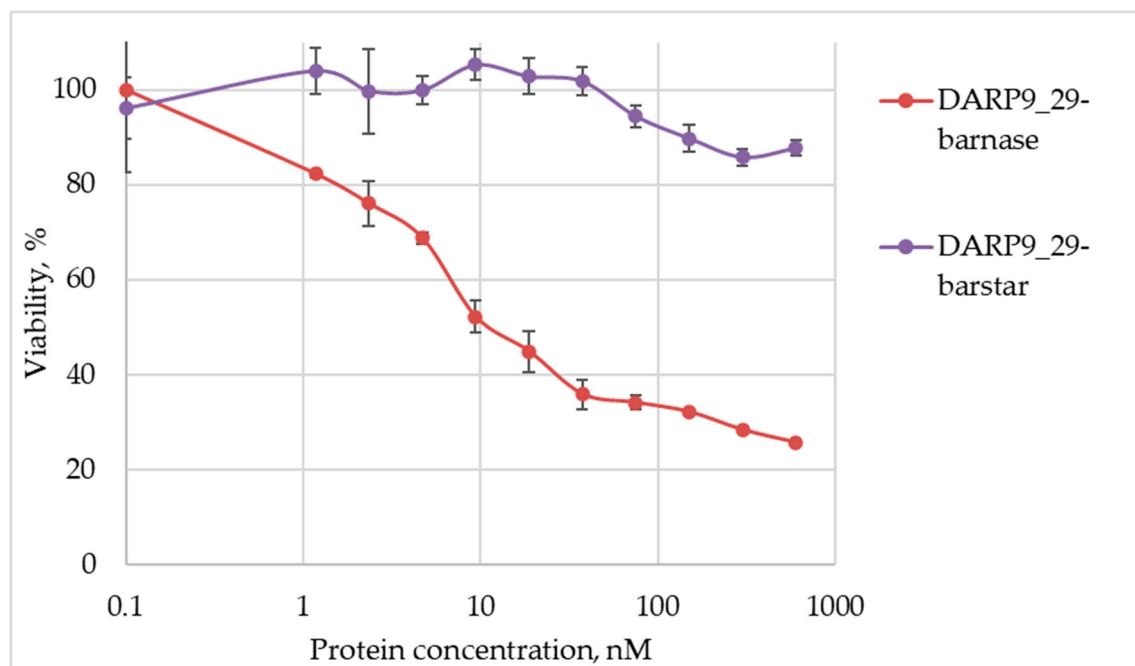

**Figure S2.** Cytotoxicity of DARP9\_29-barnase and DARP9\_29-barstar. BT-474 cells were incubated with proteins at different concentration and after 7 days of cultivation the MTT-test reflecting the number of viable cells was performed.
